# Supplementary material for: Microbial Diversity of the Chinese Tiger Frog (Hoplobatrachus rugulosus) on Healthy versus Ulcerated Skin
Source: MDPI journal article supplement (doi:10.3390/ani12101241), 2022-05-12
Supplement: s1 [file s1]

## Supplementary Materials

**Table S1.** Statistics of effective sequences of *H. rugulosus* skin samples.

| Sample ID | Total  | Taxon  | Unclassified | OTUs |
|-----------|--------|--------|--------------|------|
| HR1601N   | 73192  | 70841  | 0            | 880  |
| HR1603N   | 53515  | 50790  | 2            | 1154 |
| HR1604N   | 74684  | 71995  | 2            | 1035 |
| HR1605N   | 77015  | 73757  | 1            | 1130 |
| HR1606U   | 62435  | 60681  | 11           | 870  |
| HR1607U   | 64563  | 63119  | 7            | 802  |
| HR1609U   | 61812  | 60714  | 5            | 985  |
| HR1610U   | 74595  | 73386  | 0            | 866  |
| Total     | 541811 | 525283 | 28           | 7722 |
| Average   | 67726  | 65660  | 4            | 965  |

**Table S2.** Statistics of different taxonomic levels of *H. rugulosus* skin microbiota.

| Sample ID | Domain | Phylum | Class | Order | Family | Genus | Species |
|-----------|--------|--------|-------|-------|--------|-------|---------|
| HR1601N   | 2      | 21     | 51    | 84    | 132    | 214   | 81      |
| HR1603N   | 2      | 22     | 56    | 94    | 168    | 251   | 97      |
| HR1604N   | 2      | 19     | 57    | 88    | 148    | 237   | 101     |
| HR1605N   | 2      | 21     | 57    | 95    | 162    | 255   | 97      |
| HR1606U   | 1      | 18     | 52    | 84    | 139    | 233   | 102     |
| HR1607U   | 1      | 16     | 50    | 77    | 135    | 202   | 87      |
| HR1609U   | 1      | 16     | 53    | 84    | 151    | 257   | 96      |
| HR1610U   | 1      | 18     | 58    | 86    | 148    | 235   | 85      |
| Total     | 2      | 34     | 78    | 125   | 233    | 439   | 169     |

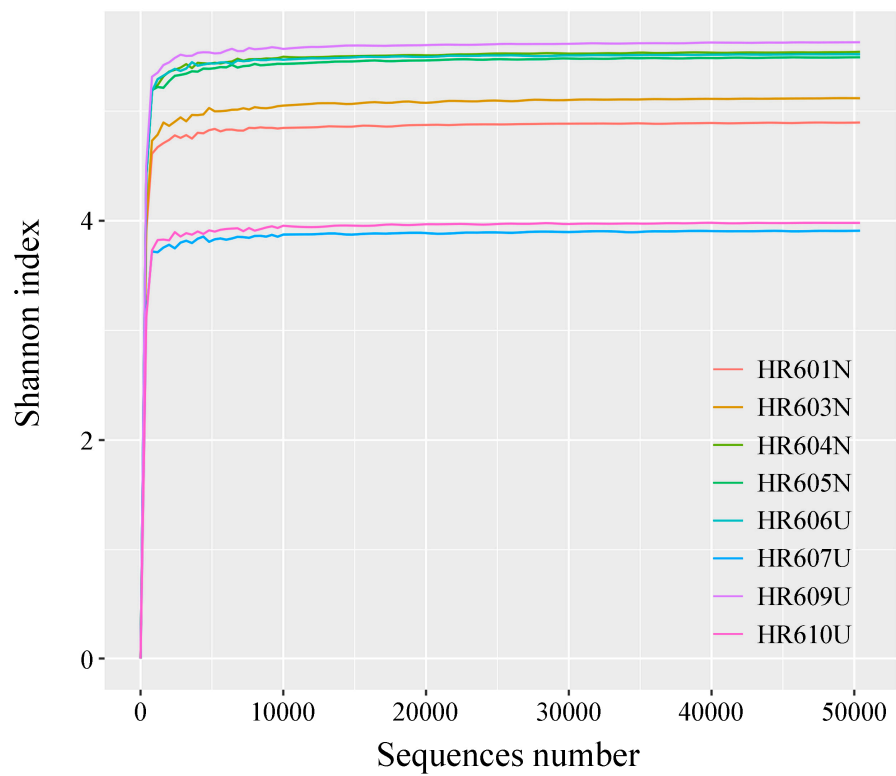

**Figure S1.** Shannon index curve of each sample. Different colors of the lines indicate different sample.

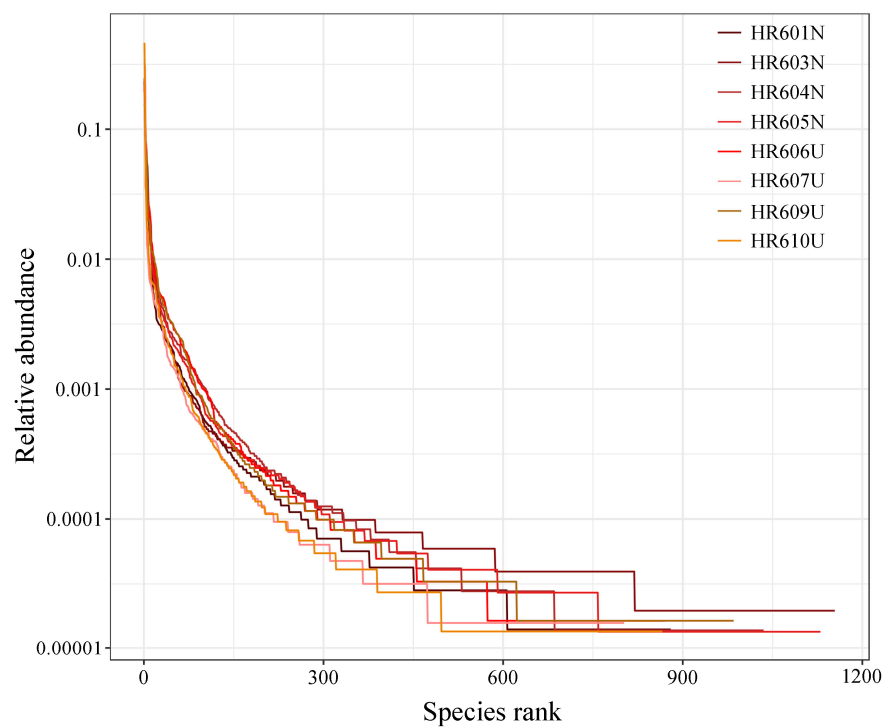

**Figure S2.** Rank abundance distribution curve of each sample. Different colors of the lines indicate different sample.

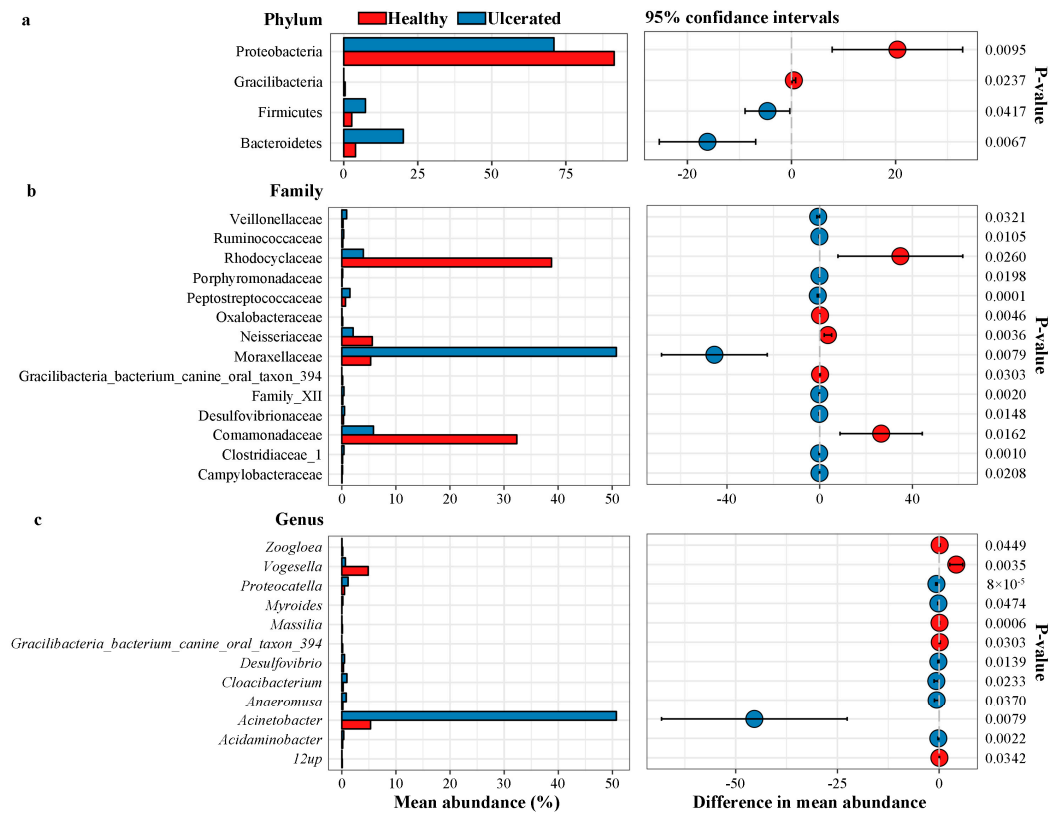

**Figure S3.** Significant difference analysis for different taxa at the (A) phylum, (B) families, and (C) genus levels between healthy and ulcerated *H. rugulosus* skins.

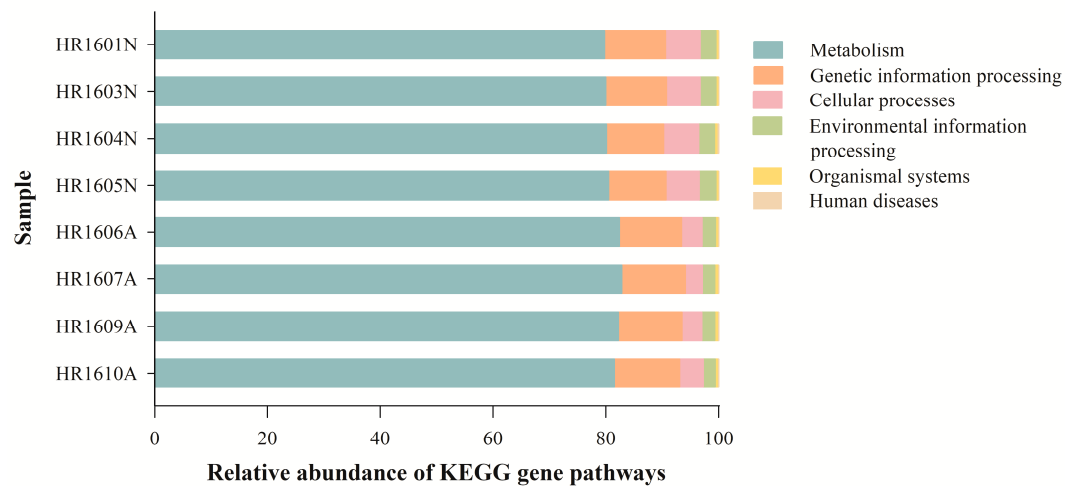

**Figure S4.** Relative abundance of *Hoplobatrachus rugulosus* skin bacterial taxa at Kyoto Encyclopedia of Genes and Genomes (KEGG) pathways.
